# Supplementary material for: A template to obtain information on gravitational mass movements from the spectrograms of the seismic signals generated
Source: Copernicus journal article supplement (doi:10.5194/esurf-2022-10), 2022-05-04

## SON\_spectrogram treatment

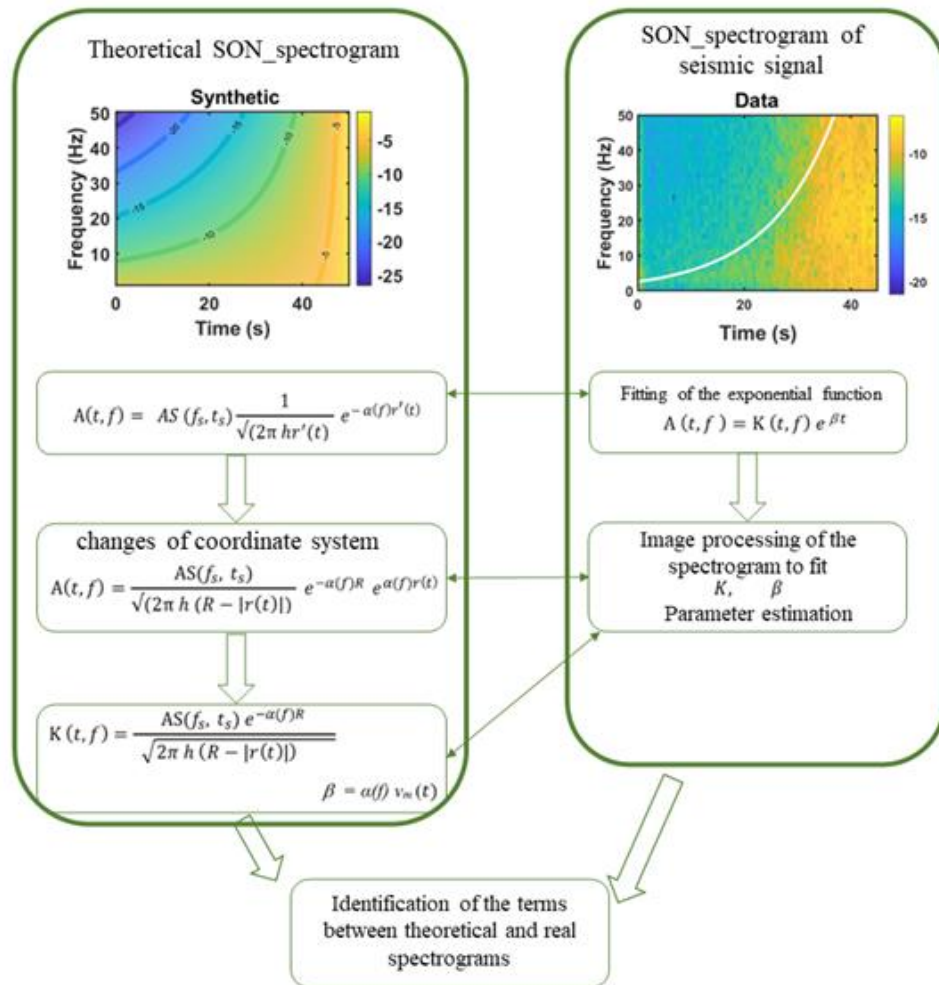

Supplement: Supplementary file [file esurf-2022-10-AC2-supplement.pdf]
